# Supplementary material for: Correlation between Volumes Determined by Echocardiography and Cardiac MRI in Controls and Atrial Fibrillation Patients
Source: MDPI journal article supplement (doi:10.3390/life11121362), 2021-12-08
Supplement: s1 [file s1]

# Supplementary material of Correlation between Volumes Determined by Echocardiography and Cardiac MRI in Controls and Atrial Fibrillation Patients

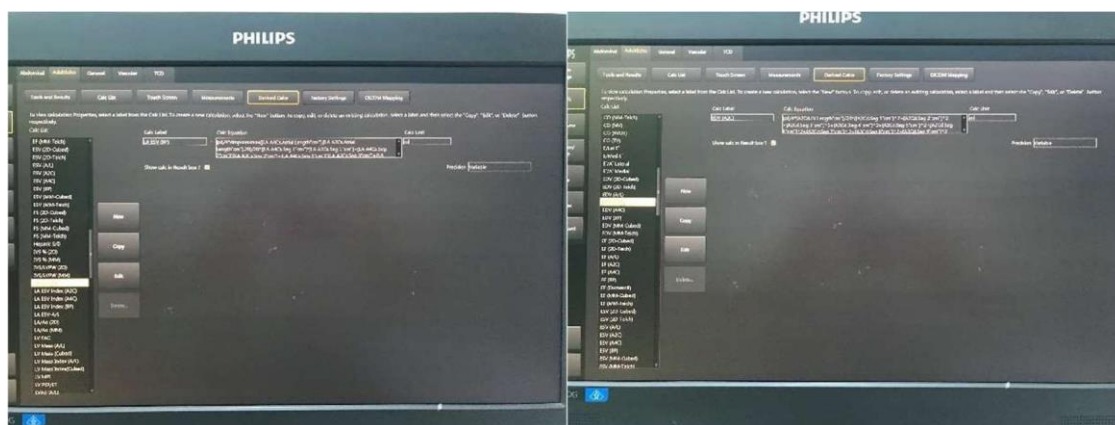

**Figure S1.** Cardiac volume determination methods.

**Table S1.** Individual Left atrium volume (LA Vol) values measured by MRI and echocardiography and their difference of the echocardiography estimations (%) for the 63 AF patients and 36 healthy Controls.

| Control No. | MRI LA Vol (mL) | Echo LA Vol (mL) | Absolute diff. (%) |
|-------------|-----------------|------------------|--------------------|
| 1           | 81.04           | 45.60            | 77.72              |
| 2           | 73.75           | 59.30            | 24.37              |
| 3           | 82.97           | 63.84            | 29.97              |
| 4           | 100.68          | 87.76            | 14.72              |
| 5           | 126.15          | 145.47           | 13.28              |
| 6           | 62.64           | 66.91            | 6.38               |
| 7           | 118.13          | 132.82           | 11.06              |
| 8           | 176.76          | 137.59           | 28.47              |
| 9           | 104.58          | 168.47           | 37.92              |
| 10          | 164.96          | 159.95           | 3.13               |
| 11          | 197.29          | 174.36           | 13.15              |
| Control No. | MRI LA Vol (mL) | Echo LA Vol (mL) | Absolute diff. (%) |
| 12          | 124.6           | 105.72           | 17.86              |
| 13          | 98.46           | 109.18           | 9.82               |
| 14          | 99.22           | 157.25           | 36.90              |
| 15          | 63.04           | 88.86            | 29.06              |
| 16          | 98.72           | 125.81           | 21.53              |
| 17          | 101.86          | 110.94           | 8.18               |
| 18          | 98.58           | 105.80           | 6.82               |
| 19          | 81.05           | 84.57            | 4.16               |
| 20          | 110.04          | 112.18           | 1.91               |
| 21          | 80.23           | 104.77           | 23.42              |
| 22          | 128.06          | 127.01           | 0.83               |
| 23          | 114.94          | 89.56            | 28.34              |
| 24          | 162.10          | 131.90           | 22.90              |
| 25          | 77.41           | 79.13            | 2.17               |
| 26          | 112.53          | 143.25           | 21.45              |
| 27          | 63.95           | 86.21            | 25.82              |
| 28          | 98.09           | 144.09           | 31.92              |

|    |        |        |       |
|----|--------|--------|-------|
| 29 | 146.62 | 131.95 | 11.12 |
| 30 | 49.89  | 62.43  | 20.09 |
| 31 | 93.37  | 76.25  | 22.45 |
| 32 | 124.92 | 88.17  | 41.68 |
| 33 | 91.41  | 104.41 | 12.45 |
| 34 | 117.79 | 113.82 | 3.49  |
| 35 | 194.02 | 123.64 | 56.92 |
| 36 | 97.84  | 110.27 | 11.27 |
| 37 | 87.45  | 80.26  | 8.96  |
| 38 | 126.1  | 95.07  | 32.64 |
| 39 | 100.21 | 122.82 | 18.41 |

| Control No. | MRI LA Vol (mL) | Echo LA Vol (mL) | Absolute diff. (%) |
|-------------|-----------------|------------------|--------------------|
| 40          | 86.42           | 70.13            | 23.23              |
| 41          | 108.60          | 140.85           | 22.90              |
| 42          | 89.98           | 86.4             | 4.14               |
| 43          | 114.58          | 92.05            | 24.48              |
| 44          | 98.60           | 97.02            | 1.63               |
| 45          | 95.59           | 76.33            | 25.23              |
| 46          | 156.4           | 153.09           | 2.16               |
| 47          | 64.75           | 60.85            | 6.41               |
| 48          | 111.17          | 117.69           | 5.54               |
| 49          | 44.37           | 66.92            | 33.70              |
| 50          | 79.07           | 83.79            | 5.63               |
| 51          | 109.36          | 147.00           | 25.61              |
| 52          | 169.42          | 159.5            | 6.22               |
| 53          | 147.13          | 85.33            | 72.42              |
| 54          | 99.86           | 118.94           | 16.04              |
| 55          | 73.46           | 71.31            | 3.02               |
| 56          | 96.47           | 136.06           | 29.10              |
| 57          | 69.51           | 82.24            | 15.48              |
| 58          | 130.64          | 141.33           | 7.56               |
| 59          | 66.41           | 81.14            | 18.15              |
| 60          | 116.29          | 90.13            | 29.02              |
| 61          | 114.21          | 94.09            | 21.38              |
| 62          | 158.57          | 115.21           | 37.64              |
| 63          | 21.00           | 88.43            | 76.25              |

| Control No. | MRI LA Vol (mL) | Echo LA Vol (mL) | Absolute diff. (%) |
|-------------|-----------------|------------------|--------------------|
| 1           | 89.22           | 66.03            | 25.99              |
| 2           | 43.23           | 47.01            | 8.73               |
| 3           | 82.20           | 64.41            | 21.64              |
| 4           | 72.51           | 68.78            | 5.14               |
| 5           | 78.52           | 90.79            | 15.63              |
| 6           | 91.21           | 75.09            | 17.67              |
| 7           | 86.76           | 59.59            | 31.31              |
| 8           | 69.57           | 63.22            | 9.12               |
| 9           | 61.50           | 39.15            | 36.34              |
| 10          | 68.95           | 47.27            | 31.44              |
| 11          | 55.07           | 44.91            | 18.45              |
| 12          | 33.35           | 57.31            | 71.86              |
| 13          | 28.27           | 42.53            | 50.42              |
| 14          | 63.76           | 69.5             | 9.00               |
| 15          | 55.81           | 49.21            | 11.82              |
| 16          | 51.96           | 34.77            | 33.09              |
| 17          | 52.25           | 44.44            | 14.95              |
| 18          | 105.95          | 101.67           | 4.04               |

|                    |                        |                         |                           |
|--------------------|------------------------|-------------------------|---------------------------|
| 19                 | 70.74                  | 47.01                   | 33.54                     |
| 20                 | 31.69                  | 37.09                   | 17.04                     |
| 21                 | 69.18                  | 55.69                   | 19.50                     |
| 22                 | 47.48                  | 46.63                   | 1.79                      |
| 23                 | 77.08                  | 98.98                   | 28.41                     |
| 24                 | 71.30                  | 65.43                   | 8.23                      |
| 25                 | 70.13                  | 78.66                   | 12.16                     |
| 26                 | 35.77                  | 43.32                   | 21.09                     |
| <b>Control No.</b> | <b>MRI LA Vol (mL)</b> | <b>Echo LA Vol (mL)</b> | <b>Absolute diff. (%)</b> |
| 27                 | 73.32                  | 65.2                    | 11.08                     |
| 28                 | 49.55                  | 68.82                   | 38.90                     |
| 29                 | 48.35                  | 54.1                    | 11.89                     |
| 30                 | 76.39                  | 58.64                   | 23.24                     |
| 31                 | 52.82                  | 33.06                   | 37.41                     |
| 32                 | 52.42                  | 51.83                   | 1.12                      |
| 33                 | 57.72                  | 52.77                   | 8.58                      |
| 34                 | 56.75                  | 69.12                   | 21.80                     |
| 35                 | 64.85                  | 57.69                   | 11.04                     |
| 36                 | 87.34                  | 85.76                   | 1.81                      |

**Table S2.** Individual EF, ESV, and EDV values measured by MRI and echocardiography and their absolute difference (%) of the echocardiography estimation for the 51 AF patients and the 30 healthy controls.

| Patient No. | MRI EF (%) | Echo EF (%) | Absolute diff. (%) | MRI ESV (mL) | Echo ESV (mL) | Absolute diff. (%) | MRI EDV (mL) | Echo EDV (mL) | Absolute diff. (%) |
|-------------|------------|-------------|--------------------|--------------|---------------|--------------------|--------------|---------------|--------------------|
| 1           | 69.80      | 62.70       | 10.17              | 34.30        | 25.90         | 24.48              | 113.58       | 69.60         | 38.72              |
| 2           | 67.40      | 62.30       | 7.56               | 64.66        | 36.20         | 44.01              | 198.31       | 96.10         | 51.54              |
| 3           | 48.04      | 49.40       | 2.82               | 65.68        | 41.60         | 36.66              | 126.41       | 82.30         | 34.89              |
| 4           | 67.78      | 52.40       | 22.69              | 33.33        | 26.10         | 21.68              | 103.44       | 54.80         | 47.02              |
| 5           | 61.69      | 44.55       | 27.79              | 49.26        | 54.25         | 10.14              | 128.58       | 97.35         | 24.29              |
| 6           | 46.86      | 62.00       | 32.32              | 59.02        | 33.50         | 43.24              | 111.06       | 87.90         | 20.85              |
| 7           | 32.71      | 42.30       | 29.33              | 145.60       | 90.70         | 37.71              | 216.37       | 157.10        | 27.39              |
| 8           | 51.85      | 55.20       | 6.47               | 68.93        | 31.60         | 54.16              | 143.15       | 70.70         | 50.61              |
| 9           | 54.88      | 56.65       | 3.22               | 54.84        | 46.45         | 15.31              | 121.56       | 106.95        | 12.02              |
| 10          | 61.19      | 54.40       | 11.10              | 51.78        | 36.35         | 29.80              | 133.43       | 80.15         | 39.93              |
| 11          | 51.79      | 58.20       | 12.37              | 96.78        | 32.30         | 66.63              | 200.76       | 77.40         | 61.45              |
| 12          | 39.37      | 44.50       | 13.03              | 130.27       | 60.10         | 53.86              | 214.85       | 107.90        | 49.78              |
| 13          | 64.09      | 67.50       | 5.32               | 40.99        | 34.70         | 15.34              | 114.14       | 106.70        | 6.52               |
| 14          | 74.71      | 56.70       | 24.11              | 35.46        | 34.90         | 1.59               | 140.23       | 80.60         | 42.52              |
| 15          | 75.67      | 62.20       | 17.80              | 31.01        | 50.20         | 61.89              | 127.45       | 132.80        | 4.20               |
| 16          | 53.24      | 47.40       | 10.97              | 75.78        | 67.20         | 11.32              | 162.06       | 127.90        | 21.08              |
| 17          | 52.02      | 52.70       | 1.32               | 108.07       | 46.80         | 56.70              | 225.22       | 98.80         | 56.13              |
| 18          | 61.27      | 64.60       | 5.43               | 44.31        | 39.80         | 10.19              | 114.43       | 112.10        | 2.04               |
| 19          | 35.78      | 58.70       | 64.04              | 67.72        | 32.00         | 52.75              | 105.46       | 77.40         | 26.61              |
| 20          | 46.76      | 46.00       | 1.63               | 75.76        | 38.40         | 49.32              | 142.31       | 71.00         | 50.11              |
| 21          | 48.16      | 56.20       | 16.69              | 52.41        | 29.50         | 43.71              | 101.10       | 67.40         | 33.33              |
| 22          | 59.29      | 46.50       | 21.57              | 62.66        | 47.40         | 24.36              | 153.93       | 88.60         | 42.44              |
| 23          | 56.14      | 57.20       | 1.89               | 93.58        | 42.10         | 55.01              | 213.37       | 98.40         | 53.88              |
| Patient No. | MRI EF (%) | Echo EF (%) | Absolute diff. (%) | MRI ESV (mL) | Echo ESV (mL) | Absolute diff. (%) | MRI EDV (mL) | Echo EDV (mL) | Absolute diff. (%) |
| 24          | 73.71      | 65.00       | 11.82              | 24.47        | 23.40         | 4.39               | 93.11        | 66.70         | 28.36              |
| 25          | 53.94      | 50.90       | 5.64               | 60.12        | 29.65         | 50.68              | 130.52       | 59.15         | 54.68              |
| 26          | 67.35      | 62.90       | 6.61               | 29.06        | 22.40         | 22.91              | 89.00        | 60.30         | 32.25              |
| 27          | 58.76      | 67.50       | 14.88              | 47.37        | 28.00         | 40.89              | 114.84       | 86.20         | 24.94              |
| 28          | 43.73      | 61.20       | 39.96              | 90.55        | 32.00         | 64.66              | 160.91       | 82.40         | 48.79              |
| 29          | 31.60      | 52.90       | 67.41              | 70.53        | 45.50         | 35.49              | 103.12       | 96.70         | 6.22               |

| 30         | 36.45      | 47.90       | 31.41              | 187.16       | 94.40         | 49.56              | 294.51       | 181.00        | 38.54              |
|------------|------------|-------------|--------------------|--------------|---------------|--------------------|--------------|---------------|--------------------|
| 31         | 79.47      | 63.10       | 20.60              | 28.17        | 26.90         | 4.52               | 137.23       | 72.90         | 46.88              |
| 32         | 57.13      | 54.80       | 4.07               | 75.63        | 40.80         | 46.05              | 176.40       | 90.10         | 48.92              |
| 33         | 30.50      | 40.00       | 31.13              | 131.44       | 62.10         | 52.75              | 189.14       | 103.60        | 45.23              |
| 34         | 55.40      | 60.20       | 8.67               | 51.60        | 36.30         | 29.65              | 115.69       | 91.20         | 21.17              |
| 35         | 62.49      | 58.00       | 7.19               | 59.42        | 33.10         | 44.30              | 158.42       | 78.80         | 50.26              |
| 36         | 47.53      | 58.00       | 22.02              | 76.74        | 35.40         | 53.87              | 146.27       | 84.30         | 42.37              |
| 37         | 55.04      | 64.80       | 17.73              | 52.53        | 33.50         | 36.23              | 116.84       | 95.20         | 18.52              |
| 38         | 64.85      | 56.30       | 13.19              | 47.67        | 41.30         | 13.36              | 135.63       | 94.50         | 30.33              |
| 39         | 62.87      | 60.60       | 3.61               | 50.84        | 34.60         | 31.94              | 136.91       | 87.70         | 35.95              |
| 40         | 54.19      | 56.70       | 4.64               | 71.57        | 43.60         | 39.08              | 156.21       | 100.80        | 35.47              |
| 41         | 53.22      | 52.60       | 1.17               | 97.42        | 47.80         | 50.94              | 208.26       | 100.90        | 51.55              |
| 42         | 66.06      | 64.00       | 3.12               | 60.88        | 35.20         | 42.18              | 179.38       | 97.80         | 45.48              |
| 43         | 25.92      | 40.00       | 54.35              | 79.29        | 50.00         | 36.94              | 107.02       | 83.30         | 22.16              |
| 44         | 56.85      | 53.85       | 5.28               | 66.56        | 56.10         | 15.71              | 154.25       | 124.15        | 19.51              |
| 45         | 51.81      | 60.60       | 16.96              | 54.30        | 47.90         | 11.78              | 112.69       | 121.60        | 7.91               |
| 46         | 60.25      | 45.90       | 23.82              | 32.38        | 28.70         | 11.37              | 81.46        | 53.10         | 34.82              |
| 47         | 75.16      | 63.00       | 16.18              | 30.14        | 30.80         | 2.19               | 121.33       | 83.40         | 31.26              |
| 48         | 46.95      | 47.20       | 0.54               | 105.75       | 84.60         | 20.00              | 199.33       | 160.20        | 19.63              |
| 49         | 27.33      | 53.60       | 96.10              | 112.17       | 46.40         | 58.63              | 154.36       | 100.10        | 35.15              |
| 50         | 72.48      | 59.90       | 17.36              | 32.26        | 26.40         | 18.18              | 117.24       | 65.90         | 43.79              |
| 51         | 70.80      | 60.30       | 14.83              | 33.47        | 28.30         | 15.45              | 114.61       | 71.30         | 37.79              |
| ControlNo. | MRI EF (%) | Echo EF (%) | Absolute diff. (%) | MRI ESV (mL) | Echo ESV (mL) | Absolute diff. (%) | MRI EDV (mL) | Echo EDV (mL) | Absolute diff. (%) |
| 1          | 70.83      | 62.00       | 12.47              | 47.89        | 39.50         | 17.51              | 164.15       | 103.80        | 36.77              |
| 2          | 64.93      | 63.80       | 1.75               | 54.56        | 35.60         | 34.76              | 155.61       | 98.40         | 36.76              |
| 3          | 63.37      | 59.50       | 6.11               | 74.84        | 56.10         | 25.04              | 204.31       | 138.40        | 32.26              |
| 4          | 79.72      | 60.40       | 24.23              | 32.51        | 40.90         | 25.82              | 160.26       | 103.30        | 35.54              |
| 5          | 76.64      | 72.40       | 5.53               | 27.38        | 18.00         | 34.27              | 117.23       | 65.20         | 44.38              |
| 6          | 79.93      | 62.10       | 22.31              | 23.94        | 31.70         | 32.40              | 119.31       | 77.90         | 34.71              |
| 7          | 63.05      | 60.10       | 4.68               | 44.13        | 31.10         | 29.53              | 119.44       | 89.90         | 24.73              |
| 8          | 68.14      | 54.00       | 20.76              | 39.85        | 41.40         | 3.89               | 125.09       | 89.90         | 28.13              |
| 9          | 57.63      | 56.70       | 1.62               | 44.26        | 33.90         | 23.40              | 104.46       | 76.40         | 26.86              |
| 10         | 65.67      | 61.80       | 5.89               | 35.92        | 37.10         | 3.29               | 104.62       | 96.70         | 7.57               |
| 11         | 64.30      | 57.40       | 10.73              | 30.65        | 32.40         | 5.73               | 85.83        | 75.90         | 11.57              |
| 12         | 59.29      | 67.80       | 14.35              | 52.90        | 27.10         | 48.77              | 129.95       | 84.10         | 35.28              |
| 13         | 53.91      | 59.10       | 9.62               | 59.21        | 40.80         | 31.10              | 128.48       | 99.80         | 22.33              |
| 14         | 63.53      | 63.80       | 0.43               | 59.04        | 36.90         | 37.50              | 161.88       | 101.80        | 37.11              |
| 15         | 70.24      | 70.90       | 0.95               | 49.67        | 28.80         | 42.01              | 166.86       | 98.90         | 40.73              |
| 16         | 64.15      | 54.30       | 15.36              | 76.41        | 70.00         | 8.39               | 213.18       | 153.20        | 28.14              |
| 17         | 60.90      | 57.00       | 6.41               | 54.97        | 38.20         | 30.51              | 140.61       | 88.80         | 36.85              |
| 18         | 82.48      | 68.30       | 17.20              | 17.87        | 26.50         | 48.25              | 102.05       | 83.70         | 17.98              |
| 19         | 55.90      | 61.30       | 9.66               | 56.97        | 32.80         | 42.42              | 129.18       | 84.60         | 34.51              |
| 20         | 70.08      | 68.80       | 1.82               | 29.40        | 25.30         | 13.96              | 98.26        | 81.10         | 17.46              |
| 21         | 67.57      | 60.00       | 11.21              | 44.78        | 54.00         | 20.59              | 138.09       | 135.00        | 2.24               |
| 22         | 83.00      | 70.80       | 14.70              | 19.11        | 20.90         | 9.36               | 112.41       | 71.70         | 36.22              |
| 23         | 71.38      | 66.30       | 7.12               | 56.21        | 32.40         | 42.36              | 196.43       | 95.90         | 51.18              |
| 24         | 65.49      | 75.10       | 14.67              | 36.45        | 16.20         | 55.55              | 105.62       | 65.10         | 38.36              |
| 25         | 62.17      | 66.20       | 6.48               | 40.56        | 25.80         | 36.39              | 107.22       | 76.40         | 28.75              |
| 26         | 72.52      | 60.80       | 16.16              | 38.96        | 43.10         | 10.64              | 141.75       | 109.90        | 22.47              |
| 27         | 68.65      | 57.70       | 15.95              | 50.08        | 43.60         | 12.94              | 159.77       | 103.10        | 35.47              |
| 28         | 56.83      | 56.90       | 0.13               | 42.39        | 43.00         | 1.43               | 98.20        | 99.90         | 1.74               |
| 29         | 57.92      | 57.40       | 0.89               | 52.34        | 39.90         | 23.76              | 124.37       | 93.60         | 24.74              |
| 30         | 72.37      | 59.20       | 18.19              | 37.37        | 42.40         | 13.45              | 135.24       | 103.90        | 23.17              |

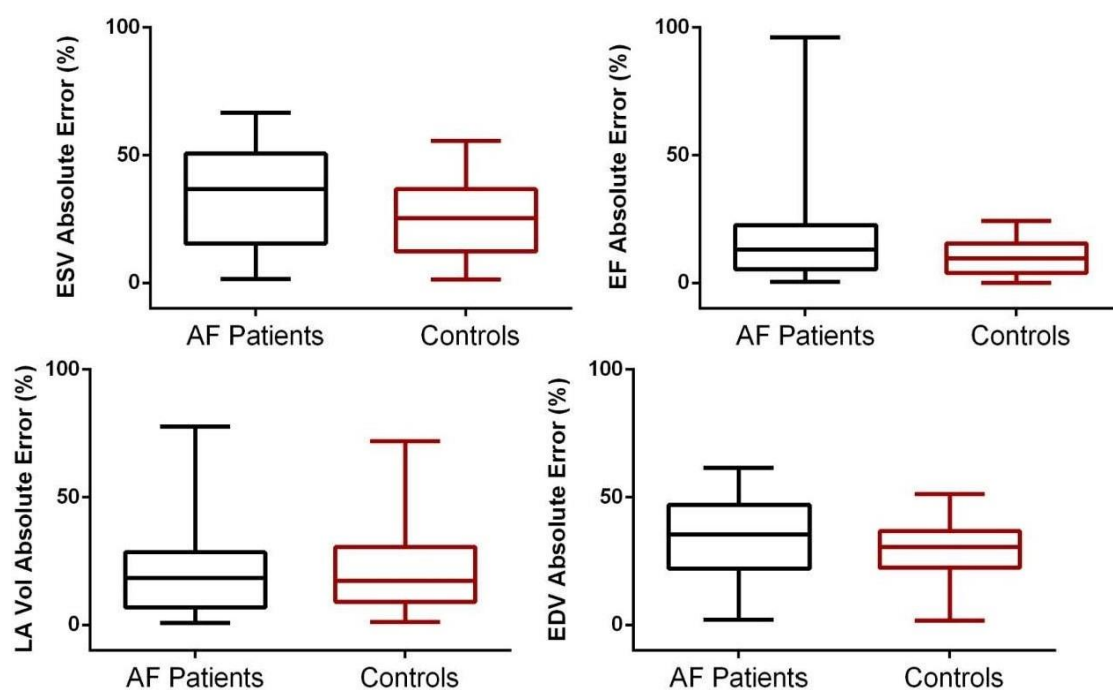

**Figure S2.** The absolute error of the echocardiography estimation of LA Vol,EDV, ESV,and EF for AF Patients and Controls.

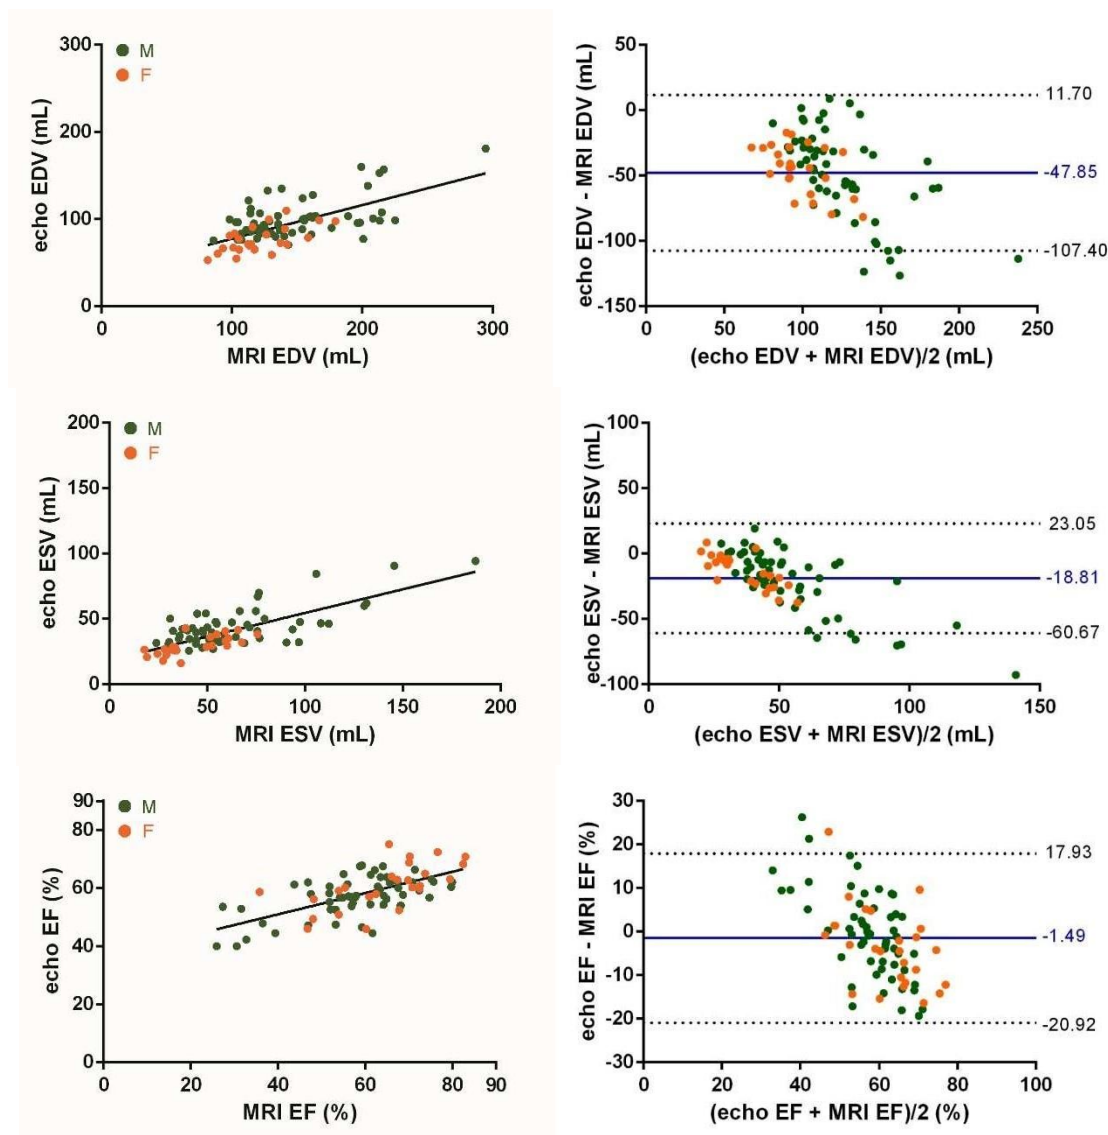

**Figure S3.** Distribution and Bland-Altman analysis results of the measured values based on participants' gender (orange-female, green-male).
